# Supplementary material for: Mechanical Properties of Ca-Saturated Hydrogels with Functionalized Alginate
Source: MDPI journal article supplement (doi:10.3390/gels5020023), 2019-04-19
Supplement: s1 [file s1]

# Supplementary file 4

Statistical data for the modified alginate gels are here given with regards to the Young's modulus, syneresis and compression and stress at rupture.

**Table S4.1.** Statistical data of the partially oxidized alginate gels with regards to the pure stipe alginate 1% gels. The values for Young's modulus and syneresis are given as the mean of the gels. Abbreviations: n = number of gels. SD = standard deviation. POA = partially oxidized alginate.

| Oxidation degree (%) | Fraction of POA | Young's modulus (kPa) | SD  | n | p-value | Syneresis (%) | SD  | n | p-value |
|----------------------|-----------------|-----------------------|-----|---|---------|---------------|-----|---|---------|
| 2                    | 0.25            | 28.4                  | 2.9 | 9 | 0.50    | 30.4          | 1.4 | 9 | 1.0     |
|                      | 0.50            | 28.1                  | 0.6 | 8 | 0.41    | 27.1          | 0.6 | 8 | <0.01   |
|                      | 0.75            | 24.9                  | 2.8 | 6 | <0.01   | 27.3          | 0.8 | 6 | 0.059   |
|                      | 1.00            | 8.7                   | 5.4 | 5 | <0.01   | 28.1          | 3.1 | 3 | 0.84    |
| 4                    | 0.25            | 32.2                  | 1.7 | 8 | 1.00    | 16.7          | 0.8 | 8 | <0.01   |
|                      | 0.50            | 26.1                  | 1.4 | 8 | <0.01   | 21.1          | 0.8 | 8 | <0.01   |
|                      | 0.75            | 19.6                  | 2.6 | 7 | <0.01   | 19.8          | 0.8 | 7 | <0.01   |
|                      | 1.00            | 8.9                   | 1.8 | 5 | <0.01   | 39.2          | 3.6 | 5 | <0.01   |
| 8                    | 0.25            | 29.3                  | 1.3 | 6 | 0.96    | 23.0          | 0.6 | 6 | <0.01   |
|                      | 0.50            | 23.8                  | 2.4 | 8 | <0.01   | 15.2          | 0.8 | 8 | <0.01   |
|                      | 0.75            | 7.1                   | 5.2 | 7 | <0.01   | 17.7          | 1.1 | 3 | <0.01   |

**Table S4.2.** Statistical data of the partially oxidized alginate gels with regards to the pure stipe alginate 1% gels. The values for deformation at rupture (compression) and stress at rupture are given as the mean of the gels. Abbreviations: n = number of gels. SD = standard deviation. POA = partially oxidized alginate.

| Oxidation degree (%) | Fraction of POA | Deformation (%) | SD  | n | p-value | Stress at rupture (N) | SD  | n | p-value |
|----------------------|-----------------|-----------------|-----|---|---------|-----------------------|-----|---|---------|
| 2                    | 0.25            | 62.2            | 2.0 | 7 | 1.0     | 35.8                  | 2.5 | 7 | 1.0     |
|                      | 0.50            | 59              | 1.8 | 7 | 0.94    | 27.3                  | 4.7 | 7 | <0.01   |
|                      | 0.75            | 59.4            | 2.4 | 6 | 0.99    | 25.5                  | 4.7 | 6 | <0.01   |
|                      | 1.00            | 61.3            | 3.4 | 5 | 1.0     | 15.1                  | 5.5 | 5 | <0.01   |
| 4                    | 0.25            | 58.4            | 2.7 | 8 | 0.73    | 26.8                  | 5.5 | 8 | <0.01   |
|                      | 0.50            | 55.7            | 5.2 | 8 | 0.017   | 17.3                  | 6.3 | 8 | <0.01   |
|                      | 0.75            | 56.9            | 1.0 | 6 | 0.21    | 14.3                  | 1.8 | 6 | <0.01   |
|                      | 1.00            | 53.2            | 1.8 | 5 | <0.01   | 7.3                   | 0.7 | 5 | <0.01   |
| 8                    | 0.25            | 57.9            | 2.4 | 6 | 0.60    | 21.3                  | 3.2 | 6 | <0.01   |
|                      | 0.50            | 53.9            | 3.1 | 7 | <0.01   | 11.3                  | 3.3 | 7 | <0.01   |
|                      | 0.75            | 53.3            | 3.9 | 7 | <0.01   | 7.1                   | 1.7 | 7 | <0.01   |

**Table S4.3.** Statistical data of the partially oxidized alginate gels with regards to the pure stipe alginate 0.5% gels. The values for Young's modulus and syneresis are given as the mean

of the gels. Abbreviations: n = number of gels. SD = standard deviation. POA = partially oxidized alginate.

| Oxidation degree (%) | Fraction of POA | Young's modulus (kPa) | SD  | n | p-value | Syneresis (%) | SD  | n | p-value |
|----------------------|-----------------|-----------------------|-----|---|---------|---------------|-----|---|---------|
| 2                    | 0.25            | 28.4                  | 2.9 | 9 | <0.01   | 30.4          | 1.4 | 9 | <0.01   |
|                      | 0.50            | 28.1                  | 0.6 | 8 | <0.01   | 27.1          | 0.6 | 8 | <0.01   |
|                      | 0.75            | 24.9                  | 2.8 | 6 | <0.01   | 27.3          | 0.8 | 6 | <0.01   |
|                      | 1.00            | 8.7                   | 5.4 | 5 | 0.92    | 28.1          | 3.1 | 3 | <0.01   |
| 4                    | 0.25            | 32.2                  | 1.7 | 8 | <0.01   | 16.7          | 0.8 | 8 | <0.01   |
|                      | 0.50            | 26.1                  | 1.4 | 8 | <0.01   | 21.1          | 0.8 | 8 | <0.01   |
|                      | 0.75            | 19.6                  | 2.6 | 7 | <0.01   | 19.8          | 0.8 | 7 | <0.01   |
|                      | 1.00            | 8.9                   | 1.8 | 5 | 0.89    | 39.2          | 3.6 | 5 | <0.01   |
| 8                    | 0.25            | 29.3                  | 1.3 | 6 | <0.01   | 23.0          | 0.6 | 6 | <0.01   |
|                      | 0.50            | 23.8                  | 2.4 | 8 | <0.01   | 15.2          | 0.8 | 8 | <0.01   |
|                      | 0.75            | 7.1                   | 5.2 | 7 | 1.0     | 17.7          | 1.1 | 3 | <0.01   |

**Table S.4.4.** Statistical data of the partially oxidized alginate gels with regards to the pure stipe alginate 0.5% gels. The values for deformation at rupture (compression) and stress at rupture are given as the mean of the gels. Abbreviations: n = number of gels. SD = standard deviation. POA = partially oxidized alginate.

| Oxidation degree (%) | Fraction of POA | Deformation (%) | SD  | n | p-value | Stress at rupture (N) | SD  | n | p-value |
|----------------------|-----------------|-----------------|-----|---|---------|-----------------------|-----|---|---------|
| 2                    | 0.25            | 62.2            | 2.0 | 7 | 0.047   | 35.8                  | 2.5 | 7 | <0.01   |
|                      | 0.50            | 59              | 1.8 | 7 | <0.01   | 27.3                  | 4.7 | 7 | 0.021   |
|                      | 0.75            | 59.4            | 2.4 | 6 | <0.01   | 25.5                  | 4.7 | 6 | 0.28    |
|                      | 1.00            | 61.3            | 3.4 | 5 | 0.028   | 15.1                  | 5.5 | 5 | 0.55    |
| 4                    | 0.25            | 58.4            | 2.7 | 8 | <0.01   | 26.8                  | 5.5 | 8 | 0.031   |
|                      | 0.50            | 55.7            | 5.2 | 8 | <0.01   | 17.3                  | 6.3 | 8 | 0.96    |
|                      | 0.75            | 56.9            | 1.0 | 6 | <0.01   | 14.3                  | 1.8 | 6 | 0.23    |
|                      | 1.00            | 53.2            | 1.8 | 5 | <0.01   | 7.3                   | 0.7 | 5 | <0.01   |
| 8                    | 0.25            | 57.9            | 2.4 | 6 | <0.01   | 21.3                  | 3.2 | 6 | 1.0     |
|                      | 0.50            | 53.9            | 3.1 | 7 | <0.01   | 11.3                  | 3.3 | 7 | <0.01   |
|                      | 0.75            | 53.3            | 3.9 | 7 | <0.01   | 7.1                   | 1.7 | 7 | <0.01   |

**Table S4.5.** Statistical data comparing the partially oxidized alginate gels with regards to the oxidation degree. Data for the 1% and 0.5% pure stipe alginate gels are also given. The values for Young's modulus are given as the mean of the gels. Abbreviations: n = number of gels. SD = standard deviation. POA 0.02 = 2% partially oxidized alginate. POA 0.04 = 4% partially oxidized alginate. POA 0.08 = 8% partially oxidized alginate.

| Fraction of POA | Gel A / Gel B       | Young's modulus (kPa) | SD        | n     | p-value |
|-----------------|---------------------|-----------------------|-----------|-------|---------|
| 0               | 1% gel / 0.5% gel   | 31.4 / 6.3            | 2.7 / 1.0 | 8 / 9 | <0.01   |
| 0.25            | POA 0.02 / POA 0.04 | 28.4 / 32.2           | 2.9 / 1.7 | 9 / 8 | 0.17    |

|      |                     |             |           |       |       |
|------|---------------------|-------------|-----------|-------|-------|
| 0.50 | POA 0.02 / POA 0.08 | 28.4 / 29.3 | 2.9 / 1.3 | 9 / 6 | 1.0   |
|      | POA 0.04 / POA 0.08 | 32.3 / 29.3 | 1.7 / 1.3 | 8 / 6 | 0.72  |
|      | POA 0.02 / POA 0.04 | 28.1 / 26.1 | 0.6 / 1.4 | 8 / 8 | 0.95  |
|      | POA 0.02 / POA 0.08 | 28.1 / 23.8 | 0.6 / 2.4 | 8 / 8 | 0.084 |
|      | POA 0.04 / POA 0.08 | 26.1 / 23.8 | 1.4 / 2.4 | 8 / 8 | 0.88  |
| 0.75 | POA 0.02 / POA 0.04 | 24.9 / 19.6 | 2.8 / 2.6 | 6 / 7 | 0.032 |
|      | POA 0.02 / POA 0.08 | 24.9 / 7.1  | 2.8 / 5.2 | 6 / 7 | <0.01 |
|      | POA 0.04 / POA 0.08 | 19.6 / 7.1  | 2.6 / 5.2 | 7 / 7 | <0.01 |
| 1.00 | POA 0.02 / POA 0.04 | 8.7 / 8.9   | 5.4 / 1.8 | 5 / 5 | 1.0   |

**Table S4.6.** Statistical data comparing the partially oxidized alginate gels with regards to the oxidation degree. Data for the 1% and 0.5% pure stipe alginate gels are also given. The values for syneresis are given as the mean of the gels. Abbreviations: n = number of gels. SD = standard deviation. POA 0.02 = 2% partially oxidized alginate. POA 0.04 = 4% partially oxidized alginate. POA 0.08 = 8% partially oxidized alginate.

| Fraction of POA | Gel A / Gel B       | Syneresis (%) | SD        | n     | p-value |
|-----------------|---------------------|---------------|-----------|-------|---------|
| 0               | 1% gel / 0.5% gel   | 29.7 / 45.7   | 0.7 / 1.7 | 9 / 9 | <0.01   |
| 0.25            | POA 0.02 / POA 0.04 | 30.4 / 16.7   | 1.4 / 0.8 | 9 / 8 | <0.01   |
|                 | POA 0.02 / POA 0.08 | 30.4 / 23.0   | 1.4 / 0.6 | 9 / 6 | <0.01   |
|                 | POA 0.04 / POA 0.08 | 16.7 / 23.0   | 0.8 / 0.6 | 8 / 6 | <0.01   |
| 0.50            | POA 0.02 / POA 0.04 | 27.1 / 21.1   | 0.6 / 0.8 | 8 / 8 | <0.01   |
|                 | POA 0.02 / POA 0.08 | 27.1 / 15.2   | 0.6 / 0.8 | 8 / 8 | <0.01   |
|                 | POA 0.04 / POA 0.08 | 21.1 / 15.2   | 0.8 / 0.8 | 8 / 8 | <0.01   |
| 0.75            | POA 0.02 / POA 0.04 | 27.3 / 19.8   | 0.8 / 0.8 | 6 / 7 | <0.01   |
|                 | POA 0.02 / POA 0.08 | 27.3 / 17.7   | 0.8 / 1.1 | 6 / 3 | <0.01   |
|                 | POA 0.04 / POA 0.08 | 19.8 / 17.7   | 0.8 / 1.1 | 7 / 3 | 0.58    |
| 1.00            | POA 0.02 / POA 0.04 | NA            | NA        | NA    | NA      |

**Table S4.7.** Statistical data comparing the partially oxidized alginate gels with regards to the oxidation degree. Data for the 1% and 0.5% pure stipe alginate gels are also given. The values for deformation at rupture (compression) are given as the mean of the gels. Abbreviations: n = number of gels. SD = standard deviation. POA 0.02 = 2% partially oxidized alginate. POA 0.04 = 4% partially oxidized alginate. POA 0.08 = 8% partially oxidized alginate.

| Fraction of POA | Gel A / Gel B       | Deformation (%) | SD        | n     | p-value |
|-----------------|---------------------|-----------------|-----------|-------|---------|
| 0               | 1% gel / 0.5% gel   | 61.4 / 67.4     | 1.1 / 3.6 | 8 / 9 | <0.01   |
| 0.25            | POA 0.02 / POA 0.04 | 62.2 / 58.4     | 2.0 / 2.7 | 7 / 8 | 0.43    |
|                 | POA 0.02 / POA 0.08 | 62.2 / 57.9     | 2.0 / 2.4 | 7 / 6 | 0.32    |
|                 | POA 0.04 / POA 0.08 | 58.4 / 57.9     | 2.7 / 2.4 | 8 / 6 | 1.0     |
| 0.50            | POA 0.02 / POA 0.04 | 59.0 / 55.7     | 1.8 / 5.2 | 7 / 8 | 0.64    |
|                 | POA 0.02 / POA 0.08 | 59.0 / 53.9     | 1.8 / 3.1 | 7 / 7 | 0.088   |
|                 | POA 0.04 / POA 0.08 | 55.7 / 53.9     | 5.2 / 3.1 | 8 / 7 | 1.0     |
| 0.75            | POA 0.02 / POA 0.04 | 59.4 / 56.9     | 2.4 / 1.0 | 6 / 6 | 0.96    |

|             |                     |             |           |       |       |
|-------------|---------------------|-------------|-----------|-------|-------|
|             | POA 0.02 / POA 0.08 | 59.4 / 53.3 | 2.4 / 3.9 | 6 / 7 | 0.026 |
|             | POA 0.04 / POA 0.08 | 56.9 / 53.3 | 1.8 / 3.9 | 6 / 7 | 0.66  |
| <b>1.00</b> | POA 0.02 / POA 0.04 | 61.3 / 53.2 | 3.4 / 1.8 | 5 / 5 | <0.01 |

**Table S4.8.** Statistical data comparing the partially oxidized alginate gels with regards to the oxidation degree. Data for the 1% and 0.5% pure stipe alginate gels are also given. The values for stress at rupture are given as the mean of the gels. Abbreviations: n = number of gels. SD = standard deviation. POA 0.02 = 2% partially oxidized alginate. POA 0.04 = 4% partially oxidized alginate. POA 0.08 = 8% partially oxidized alginate.

| Fraction of POA | Gel A / Gel B       | Stress at rupture (N) | SD        | n     | p-value |
|-----------------|---------------------|-----------------------|-----------|-------|---------|
| <b>0</b>        | 1% gel / 0.5% gel   | 37.1 / 20.0           | 2.4 / 3.3 | 8 / 9 | <0.01   |
|                 | POA 0.02 / POA 0.04 | 35.8 / 26.8           | 2.5 / 5.5 | 7 / 8 | <0.01   |
| <b>0.25</b>     | POA 0.02 / POA 0.08 | 35.8 / 21.3           | 2.5 / 3.2 | 7 / 6 | <0.01   |
|                 | POA 0.04 / POA 0.08 | 26.8 / 21.3           | 5.5 / 3.2 | 8 / 6 | 0.30    |
|                 | POA 0.02 / POA 0.04 | 27.3 / 17.3           | 4.7 / 6.3 | 7 / 8 | <0.01   |
| <b>0.50</b>     | POA 0.02 / POA 0.08 | 27.3 / 11.3           | 4.7 / 3.3 | 7 / 7 | <0.01   |
|                 | POA 0.04 / POA 0.08 | 17.3 / 11.3           | 6.3 / 3.3 | 8 / 7 | 0.16    |
|                 | POA 0.02 / POA 0.04 | 25.5 / 14.3           | 4.7 / 1.8 | 6 / 6 | <0.01   |
| <b>0.75</b>     | POA 0.02 / POA 0.08 | 25.5 / 7.1            | 4.7 / 1.7 | 6 / 7 | <0.01   |
|                 | POA 0.04 / POA 0.08 | 14.3 / 7.1            | 1.8 / 1.7 | 6 / 7 | 0.061   |
| <b>1.00</b>     | POA 0.02 / POA 0.04 | 15.1 / 7.3            | 5.5 / 0.7 | 5 / 5 | 0.093   |

**Table S4.9.** Statistical data comparing the partially oxidized alginate gels with regards to the fraction of modified alginate in the gels. The values for Young's modulus are given as the mean of the gels. Abbreviations: n = number of gels. SD = standard deviation. POA = partially oxidized alginate.

| Oxidation degree (%) | Fraction of POA | Young's modulus (kPa) | SD        | n     | p-value |
|----------------------|-----------------|-----------------------|-----------|-------|---------|
|                      | 0.25 / 0.50     | 28.4 / 28.1           | 2.9 / 0.6 | 9 / 8 | 1.0     |
|                      | 0.25 / 0.75     | 28.4 / 24.9           | 2.9 / 2.8 | 9 / 6 | 0.40    |
| <b>2</b>             | 0.25 / 1.0      | 28.4 / 8.7            | 2.9 / 5.4 | 9 / 5 | <0.01   |
|                      | 0.50 / 0.75     | 28.1 / 24.9           | 0.6 / 2.8 | 8 / 6 | 0.57    |
|                      | 0.50 / 1.0      | 28.1 / 8.7            | 0.6 / 5.4 | 8 / 5 | <0.01   |
|                      | 0.75 / 1.0      | 24.9 / 8.7            | 2.8 / 5.4 | 6 / 5 | <0.01   |
|                      | 0.25 / 0.50     | 32.2 / 26.1           | 1.7 / 1.4 | 8 / 8 | <0.01   |
|                      | 0.25 / 0.75     | 32.2 / 19.6           | 1.7 / 2.6 | 8 / 7 | <0.01   |
| <b>4</b>             | 0.25 / 1.0      | 32.2 / 8.9            | 1.7 / 1.8 | 8 / 5 | <0.01   |
|                      | 0.50 / 0.75     | 26.1 / 19.6           | 1.4 / 2.6 | 8 / 7 | <0.01   |
|                      | 0.50 / 1.0      | 26.1 / 8.9            | 1.4 / 1.8 | 8 / 5 | <0.01   |
|                      | 0.75 / 1.0      | 19.6 / 8.9            | 2.6 / 1.8 | 7 / 5 | <0.01   |
|                      | 0.25 / 0.50     | 29.3 / 23.8           | 1.3 / 2.4 | 6 / 8 | 0.02    |
| <b>8</b>             | 0.25 / 0.75     | 29.3 / 7.1            | 1.3 / 5.2 | 6 / 7 | <0.01   |
|                      | 0.50 / 0.75     | 23.8 / 7.1            | 2.4 / 5.2 | 8 / 7 | <0.01   |

**Table S4.10.** Statistical data comparing the partially oxidized alginate gels with regards to the fraction of modified alginate in the gels. The values for syneresis are given as the mean of the gels. Abbreviations: n = number of gels. SD = standard deviation. POA = partially oxidized alginate.

| Oxidation degree (%) | Fraction of POA | Syneresis (%) | SD        | n     | p-value |
|----------------------|-----------------|---------------|-----------|-------|---------|
| 2                    | 0.25 / 0.50     | 30.4 / 27.1   | 1.4 / 0.6 | 9 / 8 | <0.01   |
|                      | 0.25 / 0.75     | 30.4 / 27.3   | 1.4 / 0.8 | 9 / 6 | <0.01   |
|                      | 0.25 / 1.0      | 30.4 / 28.1   | 1.4 / 3.1 | 9 / 3 | 0.34    |
|                      | 0.50 / 0.75     | 27.1 / 27.3   | 0.6 / 0.8 | 8 / 6 | 1.0     |
|                      | 0.50 / 1.0      | 27.1 / 28.1   | 0.6 / 3.1 | 8 / 3 | 1.0     |
|                      | 0.75 / 1.0      | 27.3 / 28.1   | 0.8 / 3.1 | 6 / 3 | 1.0     |
| 4                    | 0.25 / 0.50     | 16.7 / 21.4   | 0.8 / 0.8 | 8 / 8 | <0.01   |
|                      | 0.25 / 0.75     | 16.7 / 19.8   | 0.8 / 0.8 | 8 / 7 | <0.01   |
|                      | 0.25 / 1.0      | 16.7 / 39.2   | 0.8 / 3.6 | 8 / 5 | <0.01   |
|                      | 0.50 / 0.75     | 21.4 / 19.8   | 0.8 / 0.8 | 8 / 7 | 0.81    |
|                      | 0.50 / 1.0      | 21.4 / 39.2   | 0.8 / 3.6 | 8 / 5 | <0.01   |
|                      | 0.75 / 1.0      | 19.8 / 39.2   | 0.8 / 3.6 | 7 / 5 | <0.01   |
| 8                    | 0.25 / 0.50     | 23.0 / 15.2   | 0.6 / 0.8 | 6 / 8 | <0.01   |
|                      | 0.25 / 0.75     | 23.0 / 17.7   | 0.6 / 1.1 | 6 / 3 | <0.01   |
|                      | 0.50 / 0.75     | 15.2 / 17.7   | 0.8 / 1.1 | 8 / 3 | 0.28    |

**Table S4.11.** Statistical data comparing the partially oxidized alginate gels with regards to the fraction of modified alginate in the gels. The values for deformation at rupture (compression) are given as the mean of the gels. Abbreviations: n = number of gels. SD = standard deviation. POA = partially oxidized alginate.

| Oxidation degree (%) | Fraction of POA | Deformation (%) | SD        | n     | p-value |
|----------------------|-----------------|-----------------|-----------|-------|---------|
| 2                    | 0.25 / 0.50     | 62.2 / 59.0     | 2.0 / 1.8 | 7 / 7 | 0.73    |
|                      | 0.25 / 0.75     | 62.2 / 59.4     | 2.0 / 2.4 | 7 / 6 | 0.89    |
|                      | 0.25 / 1.0      | 62.2 / 61.3     | 2.0 / 3.4 | 7 / 5 | 1.0     |
|                      | 0.50 / 0.75     | 59.0 / 59.4     | 1.8 / 2.4 | 7 / 6 | 1.0     |
|                      | 0.50 / 1.0      | 59.0 / 61.3     | 1.8 / 3.4 | 7 / 5 | 0.98    |
|                      | 0.75 / 1.0      | 59.4 / 61.3     | 2.4 / 3.4 | 6 / 5 | 1.0     |
| 4                    | 0.25 / 0.50     | 58.4 / 55.7     | 2.7 / 5.2 | 8 / 8 | 0.94    |
|                      | 0.25 / 0.75     | 58.4 / 56.9     | 2.7 / 1.0 | 8 / 6 | 1.0     |
|                      | 0.25 / 1.0      | 58.4 / 53.2     | 2.7 / 1.8 | 8 / 5 | 0.12    |
|                      | 0.50 / 0.75     | 55.7 / 56.9     | 5.2 / 1.0 | 8 / 6 | 1.0     |
|                      | 0.50 / 1.0      | 55.7 / 53.2     | 5.2 / 1.8 | 8 / 5 | 0.95    |
|                      | 0.75 / 1.0      | 56.9 / 53.2     | 1.0 / 1.8 | 6 / 5 | 0.72    |
| 8                    | 0.25 / 0.50     | 57.9 / 53.9     | 2.4 / 3.1 | 6 / 7 | 0.46    |
|                      | 0.25 / 0.75     | 57.9 / 53.3     | 2.4 / 3.9 | 6 / 7 | 0.26    |
|                      | 0.50 / 0.75     | 53.9 / 53.3     | 3.1 / 3.9 | 7 / 7 | 1.0     |

**Table S4.12.** Statistical data comparing the partially oxidized alginate gels with regards to the fraction of modified alginate in the gels. The values for stress at rupture are given as the

mean of the gels. Abbreviations: n = number of gels. SD = standard deviation. POA = partially oxidized alginate.

| Oxidation degree (%) | Fraction of POA | Stress at rupture (N) | SD        | n     | p-value |
|----------------------|-----------------|-----------------------|-----------|-------|---------|
| 2                    | 0.25 / 0.50     | 35.8 / 27.3           | 2.5 / 4.7 | 7 / 7 | <0.01   |
|                      | 0.25 / 0.75     | 35.8 / 25.5           | 2.5 / 4.7 | 7 / 6 | <0.01   |
|                      | 0.25 / 1.0      | 35.8 / 15.1           | 2.5 / 5.5 | 7 / 5 | <0.01   |
|                      | 0.50 / 0.75     | 27.3 / 25.5           | 4.7 / 4.7 | 7 / 6 | 1.0     |
|                      | 0.50 / 1.0      | 27.3 / 15.1           | 4.7 / 5.5 | 7 / 5 | <0.01   |
|                      | 0.75 / 1.0      | 25.5 / 15.1           | 4.7 / 5.5 | 6 / 5 | <0.01   |
| 4                    | 0.25 / 0.50     | 26.8 / 17.3           | 5.5 / 6.3 | 8 / 8 | <0.01   |
|                      | 0.25 / 0.75     | 26.8 / 14.3           | 5.5 / 1.8 | 8 / 6 | <0.01   |
|                      | 0.25 / 1.0      | 26.8 / 7.3            | 5.5 / 0.7 | 8 / 5 | <0.01   |
|                      | 0.50 / 0.75     | 17.3 / 14.3           | 6.3 / 1.8 | 8 / 6 | 0.97    |
|                      | 0.50 / 1.0      | 17.3 / 7.3            | 6.3 / 0.7 | 8 / 5 | <0.01   |
|                      | 0.75 / 1.0      | 14.3 / 7.3            | 1.8 / 0.7 | 6 / 5 | 0.15    |
| 8                    | 0.25 / 0.50     | 21.3 / 11.3           | 3.2 / 3.3 | 6 / 7 | <0.01   |
|                      | 0.25 / 0.75     | 21.3 / 7.1            | 3.2 / 1.7 | 6 / 7 | <0.01   |
|                      | 0.50 / 0.75     | 11.3 / 7.1            | 3.3 / 1.7 | 7 / 7 | 0.70    |

**Table S4.13.** Statistical data of the partially oxidized alginate gels with regards to the pure stipe alginate 1% gels. The values for Young's modulus are given as the mean of the gels. Abbreviations: n = number of gels. SD = standard deviation. POA = partially oxidized alginate.  $\beta$ CyD =  $\beta$ -cyclodextrin. POA-MeOTyr = POA grafted with L-Tyrosine methyl ester. POA- $\beta$ CyD = POA grafted with  $\beta$ -cyclodextrin. POA-GRGDSP = POA grafted with peptide GRGDSP.

| Unmodified alginate mixed with: | Fraction of modified alginate | Young's modulus (kPa) | SD  | n  | p-value |
|---------------------------------|-------------------------------|-----------------------|-----|----|---------|
| free $\beta$ CyD                | NA                            | 30.4                  | 2.3 | 9  | 1.0     |
| POA-MeOTyr                      | 0.25                          | 21.1                  | 2.4 | 10 | <0.01   |
|                                 | 0.50                          | 15.0                  | 2.1 | 10 | <0.01   |
|                                 | 0.75                          | 7.7                   | 0.4 | 10 | <0.01   |
| POA- $\beta$ CyD                | 0.25                          | 21.9                  | 4.4 | 10 | <0.01   |
|                                 | 0.50                          | 14.5                  | 1.2 | 10 | <0.01   |
|                                 | 0.75                          | 6.7                   | 1.2 | 9  | <0.01   |
| POA-GRGDSP                      | 0.50                          | 14.0                  | 0.9 | 8  | <0.01   |

**Table S4.14.** Statistical data of the partially oxidized alginate gels with regards to the pure stipe alginate 1% gels. The values for syneresis are given as the mean of the gels. Abbreviations: n = number of gels. SD = standard deviation. POA = partially oxidized alginate.  $\beta$ CyD =  $\beta$ -cyclodextrin. POA-MeOTyr = POA grafted with L-Tyrosine methyl ester. POA- $\beta$ CyD = POA grafted with  $\beta$ -cyclodextrin. POA-GRGDSP = POA grafted with peptide GRGDSP.

| Unmodified alginate mixed with: | Fraction of modified alginate | Syneresis (%) | SD  | n  | p-value |
|---------------------------------|-------------------------------|---------------|-----|----|---------|
| free $\beta$ CyD                | NA                            | 25.0          | 1.4 | 9  | <0.01   |
| POA-MeOTyr                      | 0.25                          | 25.4          | 0.5 | 10 | <0.01   |
|                                 | 0.50                          | 22.9          | 2.6 | 10 | <0.01   |
|                                 | 0.75                          | 20.9          | 0.8 | 10 | <0.01   |
| POA- $\beta$ CyD                | 0.25                          | 19.5          | 1.1 | 10 | <0.01   |
|                                 | 0.50                          | 15.2          | 1.0 | 10 | <0.01   |
|                                 | 0.75                          | 15.6          | 2.1 | 9  | <0.01   |
| POA-GRGDSP                      | 0.50                          | 19.0          | 1.8 | 8  | <0.01   |

**Table S4.15.** Statistical data of the partially oxidized alginate gels with regards to the pure stipe alginate 1% gels. The values for deformation at rupture (compression) are given as the mean of the gels. Abbreviations: n = number of gels. SD = standard deviation. POA = partially oxidized alginate.  $\beta$ CyD =  $\beta$ -cyclodextrin. POA-MeOTyr = POA grafted with L-Tyrosine methyl ester. POA- $\beta$ CyD = POA grafted with  $\beta$ -cyclodextrin. POA-GRGDSP = POA grafted with peptide GRGDSP.

| Unmodified alginate mixed with: | Fraction of modified alginate | Deformation (%) | SD  | n  | p-value |
|---------------------------------|-------------------------------|-----------------|-----|----|---------|
| free $\beta$ CyD                | NA                            | 64.6            | 2.9 | 9  | 0.87    |
| POA-MeOTyr                      | 0.25                          | 58.0            | 2.3 | 10 | 0.78    |
|                                 | 0.50                          | 61.6            | 6.8 | 10 | 1.0     |
|                                 | 0.75                          | 58.3            | 2.5 | 10 | 0.88    |
| POA- $\beta$ CyD                | 0.25                          | 61.3            | 7.1 | 10 | 1.0     |
|                                 | 0.50                          | 54.0            | 1.8 | 10 | <0.01   |
|                                 | 0.75                          | 48.6            | 3.3 | 9  | <0.01   |
| POA-GRGDSP                      | 0.50                          | 58.0            | 2.1 | 8  | 0.85    |

**Table S4.16.** Statistical data of the partially oxidized alginate gels with regards to the pure stipe alginate 1% gels. The values for the stress at rupture are given as the mean of the gels. Abbreviations: n = number of gels. SD = standard deviation. POA = partially oxidized alginate.  $\beta$ CyD =  $\beta$ -cyclodextrin. POA-MeOTyr = POA grafted with L-Tyrosine methyl ester. POA- $\beta$ CyD = POA grafted with  $\beta$ -cyclodextrin. POA-GRGDSP = POA grafted with peptide GRGDSP.

| Unmodified alginate mixed with: | Fraction of modified alginate | Stress at rupture (N) | SD  | n  | p-value |
|---------------------------------|-------------------------------|-----------------------|-----|----|---------|
| free $\beta$ CyD                | NA                            | 38.4                  | 4.9 | 9  | 1.0     |
| POA-MeOTyr                      | 0.25                          | 15.8                  | 3.6 | 10 | <0.01   |
|                                 | 0.50                          | 9.9                   | 4.6 | 10 | <0.01   |
|                                 | 0.75                          | 6.9                   | 1.9 | 10 | <0.01   |
| POA- $\beta$ CyD                | 0.25                          | 24.0                  | 2.0 | 10 | <0.01   |
|                                 | 0.50                          | 10.9                  | 1.2 | 10 | <0.01   |
|                                 | 0.75                          | 2.8                   | 0.4 | 9  | <0.01   |
| POA-GRGDSP                      | 0.50                          | 13.0                  | 1.8 | 8  | <0.01   |

**Table S4.17.** Statistical data comparing the partially oxidized alginate gels with regards to the fraction of modified alginate in the gels. The values for Young's modulus are given as the mean of the gels. Abbreviations: n = number of gels. SD = standard deviation. POA = partially oxidized alginate.  $\beta$ CyD =  $\beta$ -cyclodextrin. POA-MeOTyr = POA grafted with L-Tyrosine methyl ester. POA- $\beta$ CyD = POA grafted with  $\beta$ -cyclodextrin. POA-GRGDSP = POA grafted with peptide GRGDSP.

| Fraction of modified alginate | Gel A / Gel B                | Young's modulus (kPa) | SD        | n       | p-value |
|-------------------------------|------------------------------|-----------------------|-----------|---------|---------|
| 0.25                          | POA 0.08 / POA MeOTyr        | 29.3 / 21.1           | 1.3 / 2.4 | 6 / 10  | <0.01   |
|                               | POA 0.08 / POA $\beta$ CyD   | 29.3 / 21.9           | 1.3 / 4.4 | 6 / 10  | <0.01   |
|                               | POA MeOTyr / POA $\beta$ CyD | 21.1 / 21.9           | 2.4 / 4.4 | 10 / 10 | 1.0     |
| 0.50                          | POA 0.08 / POA MeOTyr        | 23.8 / 15.0           | 2.4 / 2.1 | 8 / 10  | <0.01   |
|                               | POA 0.08 / POA $\beta$ CyD   | 23.8 / 14.5           | 2.4 / 1.2 | 8 / 10  | <0.01   |
|                               | POA 0.08 / POA GRGDSP        | 23.8 / 14.0           | 2.4 / 0.9 | 8 / 8   | <0.01   |
|                               | POA MeOTyr / POA $\beta$ CyD | 15.0 / 14.5           | 2.1 / 1.2 | 10 / 10 | 1.0     |
|                               | POA MeOTyr / POA GRGDSP      | 15.0 / 14.0           | 2.1 / 0.9 | 10 / 8  | 1.0     |
|                               | POA $\beta$ CyD / POA GRGDSP | 14.5 / 14.0           | 1.2 / 0.9 | 10 / 8  | 1.0     |
|                               | POA 0.08 / POA MeOTyr        | 7.1 / 7.7             | 5.2 / 0.4 | 7 / 10  | 1.0     |
| 0.75                          | POA 0.08 / POA $\beta$ CyD   | 7.1 / 6.7             | 5.2 / 1.2 | 7 / 9   | 1.0     |
|                               | POA MeOTyr / POA $\beta$ CyD | 7.7 / 6.7             | 0.4 / 1.2 | 10 / 9  | 1.0     |

**Table S4.18.** Statistical data comparing the partially oxidized alginate gels with regards to the fraction of modified alginate in the gels. The values for syneresis are given as the mean of the gels. Abbreviations: n = number of gels. SD = standard deviation. POA = partially oxidized alginate.  $\beta$ CyD =  $\beta$ -cyclodextrin. POA-MeOTyr = POA grafted with L-Tyrosine methyl ester. POA- $\beta$ CyD = POA grafted with  $\beta$ -cyclodextrin. POA-GRGDSP = POA grafted with peptide GRGDSP.

| Fraction of modified alginate | Gel A / Gel B                | Syneresis (%) | SD        | n       | p-value |
|-------------------------------|------------------------------|---------------|-----------|---------|---------|
| 0.25                          | POA 0.08 / POA MeOTyr        | 23.0 / 25.4   | 0.6 / 0.5 | 6 / 10  | 0.066   |
|                               | POA 0.08 / POA $\beta$ CyD   | 23.0 / 19.5   | 0.6 / 1.1 | 6 / 10  | <0.01   |
|                               | POA MeOTyr / POA $\beta$ CyD | 25.4 / 19.5   | 0.5 / 1.1 | 10 / 10 | <0.01   |
| 0.50                          | POA 0.08 / POA MeOTyr        | 15.2 / 22.9   | 0.8 / 2.6 | 8 / 10  | <0.01   |
|                               | POA 0.08 / POA $\beta$ CyD   | 15.2 / 15.2   | 0.8 / 1.0 | 8 / 10  | 1.0     |
|                               | POA 0.08 / POA GRGDSP        | 15.2 / 19.0   | 0.8 / 1.8 | 8 / 8   | <0.01   |
|                               | POA MeOTyr / POA $\beta$ CyD | 22.9 / 15.2   | 2.6 / 1.0 | 10 / 10 | <0.01   |
|                               | POA MeOTyr / POA GRGDSP      | 22.9 / 19.0   | 2.6 / 1.8 | 10 / 8  | <0.01   |
|                               | POA $\beta$ CyD / POA GRGDSP | 15.2 / 19.0   | 1.0 / 1.8 | 10 / 8  | <0.01   |
|                               | POA 0.08 / POA MeOTyr        | 17.7 / 20.9   | 1.1 / 0.8 | 3 / 10  | 0.044   |
| 0.75                          | POA 0.08 / POA $\beta$ CyD   | 17.7 / 15.6   | 1.1 / 3.3 | 3 / 9   | 0.50    |
|                               | POA MeOTyr / POA $\beta$ CyD | 20.9 / 15.6   | 0.8 / 3.3 | 10 / 9  | <0.01   |

**Table S4.19.** Statistical data comparing the partially oxidized alginate gels with regards to the fraction of modified alginate in the gels. The values for deformation at rupture (compression) are given as the mean of the gels. Abbreviations: n = number of gels. SD = standard deviation. POA = partially oxidized alginate.  $\beta$ CyD =  $\beta$ -cyclodextrin. POA-MeOTyr = POA grafted with L-Tyrosine methyl ester. POA- $\beta$ CyD = POA grafted with  $\beta$ -cyclodextrin. POA-GRGDSP = POA grafted with peptide GRGDSP.

| Fraction of modified alginate | Gel A / Gel B                | Deformation (%) | SD        | n       | p-value |
|-------------------------------|------------------------------|-----------------|-----------|---------|---------|
| 0.25                          | POA 0.08 / POA MeOTyr        | 57.9 / 58.0     | 2.4 / 2.3 | 6 / 10  | 1.0     |
|                               | POA 0.08 / POA $\beta$ CyD   | 57.9 / 61.3     | 2.4 / 7.1 | 6 / 10  | 0.86    |
|                               | POA MeOTyr / POA $\beta$ CyD | 58.0 / 61.3     | 2.3 / 7.1 | 10 / 10 | 0.76    |
| 0.50                          | POA 0.08 / POA MeOTyr        | 53.9 / 61.6     | 3.1 / 6.8 | 7 / 10  | <0.01   |
|                               | POA 0.08 / POA $\beta$ CyD   | 53.9 / 24.0     | 3.1 / 1.8 | 7 / 10  | 1.0     |
|                               | POA 0.08 / POA GRGDSP        | 53.9 / 58.0     | 3.1 / 2.1 | 7 / 8   | 0.65    |
|                               | POA MeOTyr / POA $\beta$ CyD | 61.6 / 24.0     | 6.8 / 1.8 | 10 / 10 | <0.01   |
|                               | POA MeOTyr / POA GRGDSP      | 61.6 / 58.0     | 6.8 / 2.1 | 10 / 8  | 0.74    |
|                               | POA $\beta$ CyD / POA GRGDSP | 24.0 / 58.0     | 1.8 / 2.1 | 10 / 8  | 0.54    |
|                               |                              |                 |           |         |         |
| 0.75                          | POA 0.08 / POA MeOTyr        | 53.3 / 58.3     | 3.9 / 2.5 | 7 / 10  | 0.28    |
|                               | POA 0.08 / POA $\beta$ CyD   | 53.3 / 48.6     | 3.9 / 3.3 | 7 / 9   | 0.38    |
|                               | POA MeOTyr / POA $\beta$ CyD | 58.3 / 48.6     | 2.5 / 3.3 | 10 / 9  | <0.01   |

**Table S4.20.** Statistical data comparing the partially oxidized alginate gels with regards to the fraction of modified alginate in the gels. The values for stress at rupture are given as the mean of the gels. Abbreviations: n = number of gels. SD = standard deviation. POA = partially oxidized alginate.  $\beta$ CyD =  $\beta$ -cyclodextrin. POA-MeOTyr = POA grafted with L-Tyrosine methyl ester. POA- $\beta$ CyD = POA grafted with  $\beta$ -cyclodextrin. POA-GRGDSP = POA grafted with peptide GRGDSP.

| Fraction of modified alginate | Gel A / Gel B                | Stress at rupture (N) | SD        | n       | p-value |
|-------------------------------|------------------------------|-----------------------|-----------|---------|---------|
| 0.25                          | POA 0.08 / POA MeOTyr        | 21.3 / 15.8           | 3.2 / 3.6 | 6 / 10  | 0.021   |
|                               | POA 0.08 / POA $\beta$ CyD   | 21.3 / 24.0           | 3.2 / 2.0 | 6 / 10  | 0.80    |
|                               | POA MeOTyr / POA $\beta$ CyD | 15.8 / 24.0           | 3.6 / 2.0 | 10 / 10 | <0.01   |
| 0.50                          | POA 0.08 / POA MeOTyr        | 11.3 / 9.9            | 3.3 / 4.6 | 7 / 10  | 1.0     |
|                               | POA 0.08 / POA $\beta$ CyD   | 11.3 / 10.9           | 3.3 / 1.2 | 7 / 10  | 1.0     |
|                               | POA 0.08 / POA GRGDSP        | 11.3 / 13.0           | 3.3 / 1.8 | 7 / 8   | 0.99    |
|                               | POA MeOTyr / POA $\beta$ CyD | 9.9 / 10.9            | 4.6 / 1.2 | 10 / 10 | 1.0     |
|                               | POA MeOTyr / POA GRGDSP      | 9.9 / 13.0            | 4.6 / 1.8 | 10 / 8  | 0.52    |
|                               | POA $\beta$ CyD / POA GRGDSP | 10.9 / 13.0           | 1.2 / 1.8 | 10 / 8  | 0.93    |
|                               |                              |                       |           |         |         |
| 0.75                          | POA 0.08 / POA MeOTyr        | 7.1 / 6.9             | 1.7 / 1.9 | 7 / 10  | 1.0     |
|                               | POA 0.08 / POA $\beta$ CyD   | 7.1 / 2.8             | 1.7 / 0.4 | 7 / 9   | 0.14    |
|                               | POA MeOTyr / POA $\beta$ CyD | 6.9 / 2.8             | 1.9 / 0.4 | 10 / 9  | 0.091   |

**Table S4.21.** Statistical data comparing the gels with epimerized POA-MeOTyr with gels containing non-epimerized POA-MeOTyr ( $W_{\text{POA}^*} = 0.50$ ). The values are given as the mean and standard deviation of the data for the epimerized gels. Abbreviations: n = number of gels. POA-MeOTyr = POA grafted with L-Tyrosine methyl ester.

| Young's modulus (kPa) | p-value | Syneresis (%)        | p-value | Deformation at rupture (%) | p-value | Stress at rupture (kg) | p-value |
|-----------------------|---------|----------------------|---------|----------------------------|---------|------------------------|---------|
| 12.9 ± 3.5,<br>n = 6  | 0.21    | 21.7 ± 1.7,<br>n = 6 | 0.27    | 53.3 ± 1.9,<br>n = 6       | 0.0039  | 1.2 ± 0.4,<br>n = 6    | 0.54    |

Statistical data for the modified alginate gels are here given with regards to the Young's modulus, syneresis and compression and stress at rupture.
